# Supplementary material for: Adaptive Changes in Glucose Homeostasis and Islet Function During Pregnancy: A Targeted Metabolomics Study in Mice
Source: PubMed Central journal article supplement (PMC9116578; doi:10.3389/fendo.2022.852149), 2022-05-04
Supplement: DataSheet_1.pdf [file DataSheet_1.pdf]

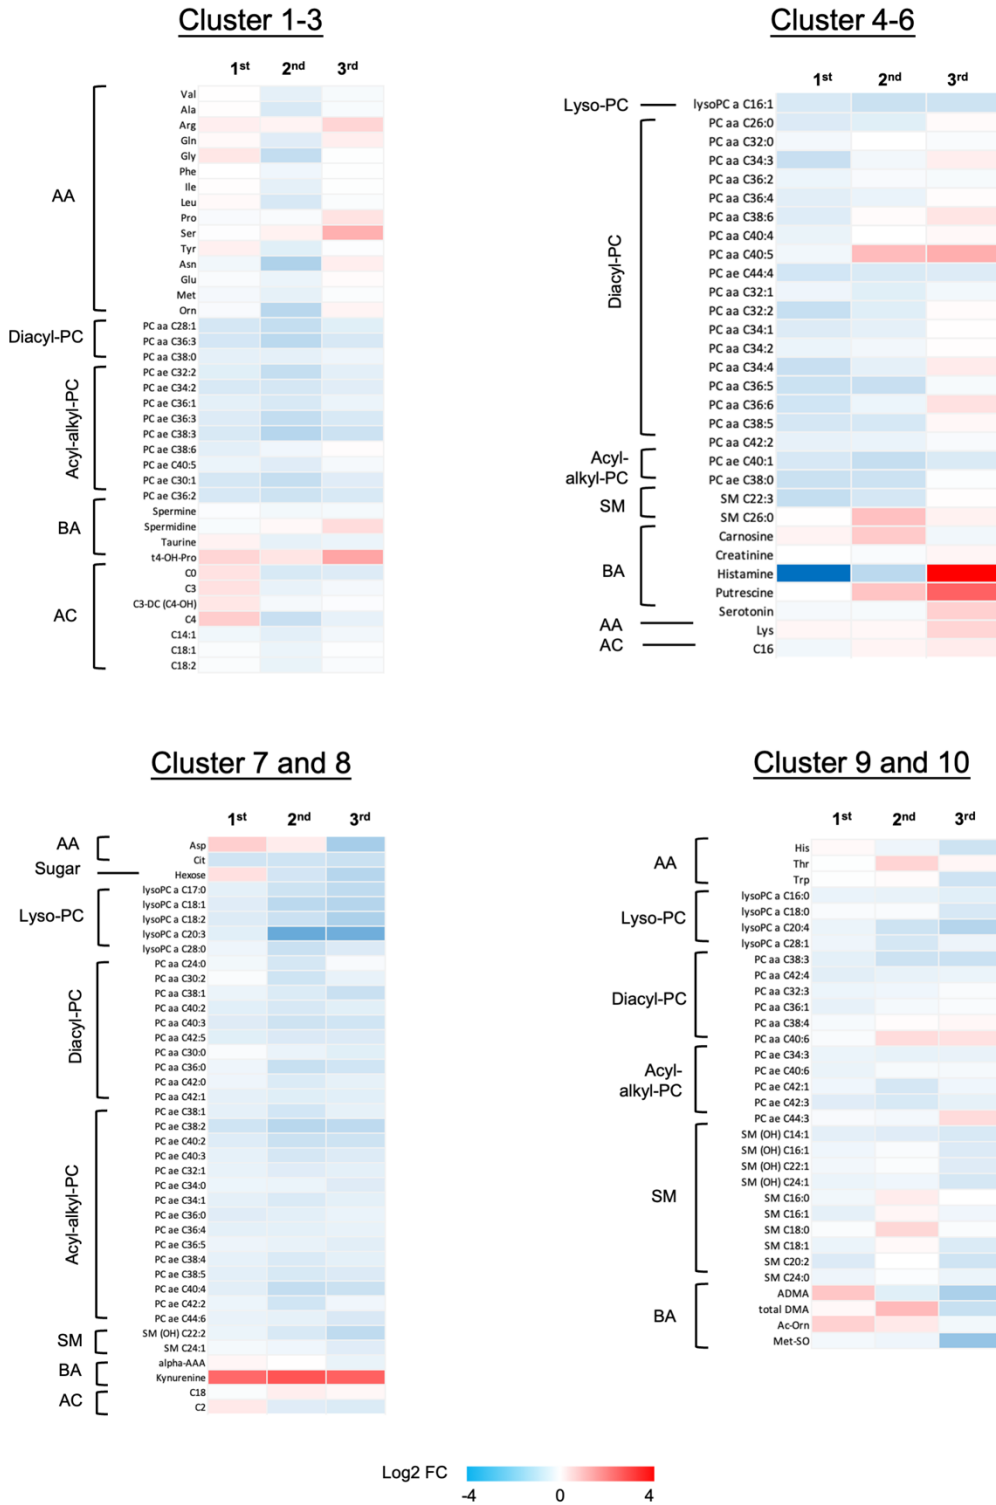

**Supplementary Figure 1. Dynamic changes of metabolic profiles in the fasting plasma during the three trimesters of pregnancy.** Fold changes are log transformed and indicated by color scale in the matrix. Metabolites within each cluster were indicated. Red color indicates up-regulated in pregnant mice, whereas blue represents down-regulated in pregnant mice, compared to age-matched, non-pregnant female mice.

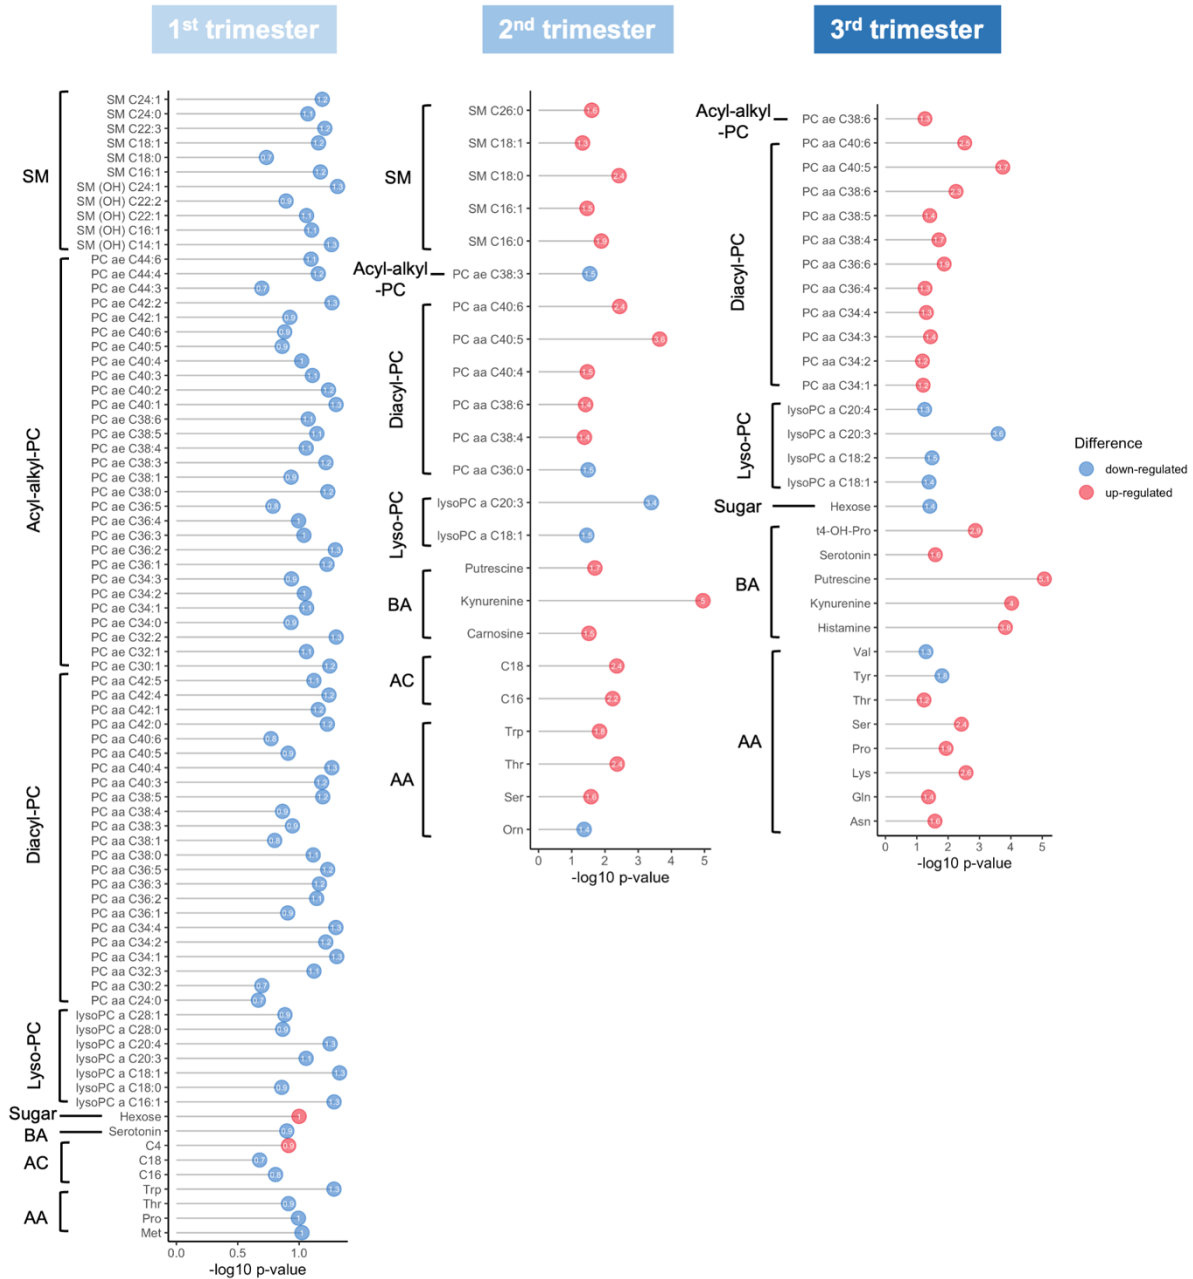

**Supplementary Figure 2. Differentially expressed metabolites in circulation during the three trimesters of pregnancy.** Bubble plots showing the differentially expressed metabolites (FDR<0.3) with the  $-\log_{10}$  p-values. Red indicates up-regulated in pregnant mice, blue indicates down-regulated in pregnant mice, compared to age-matched, non-pregnant female mice.

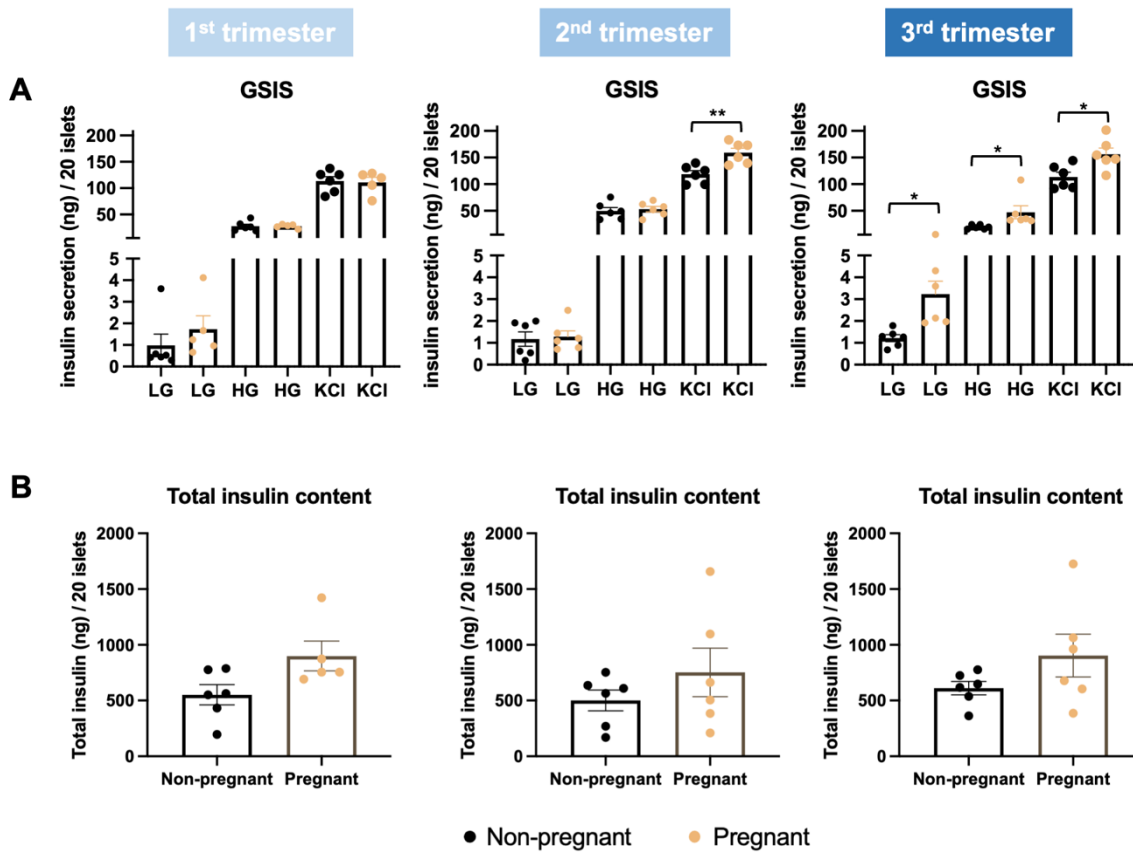

**Supplementary Figure 3. Glucose stimulated insulin secretion in islets collected during the three trimesters of pregnancy.** A) Insulin secretion of 20 isolated islets under low glucose (2mM), high glucose (11mM) and KCl treatment. B) Total insulin content of 20 isolated islets. \* $P < 0.05$ , \*\* $P < 0.01$ , \*\*\* $P < 0.001$ , compared to age-matched, non-pregnant FVB female mice.

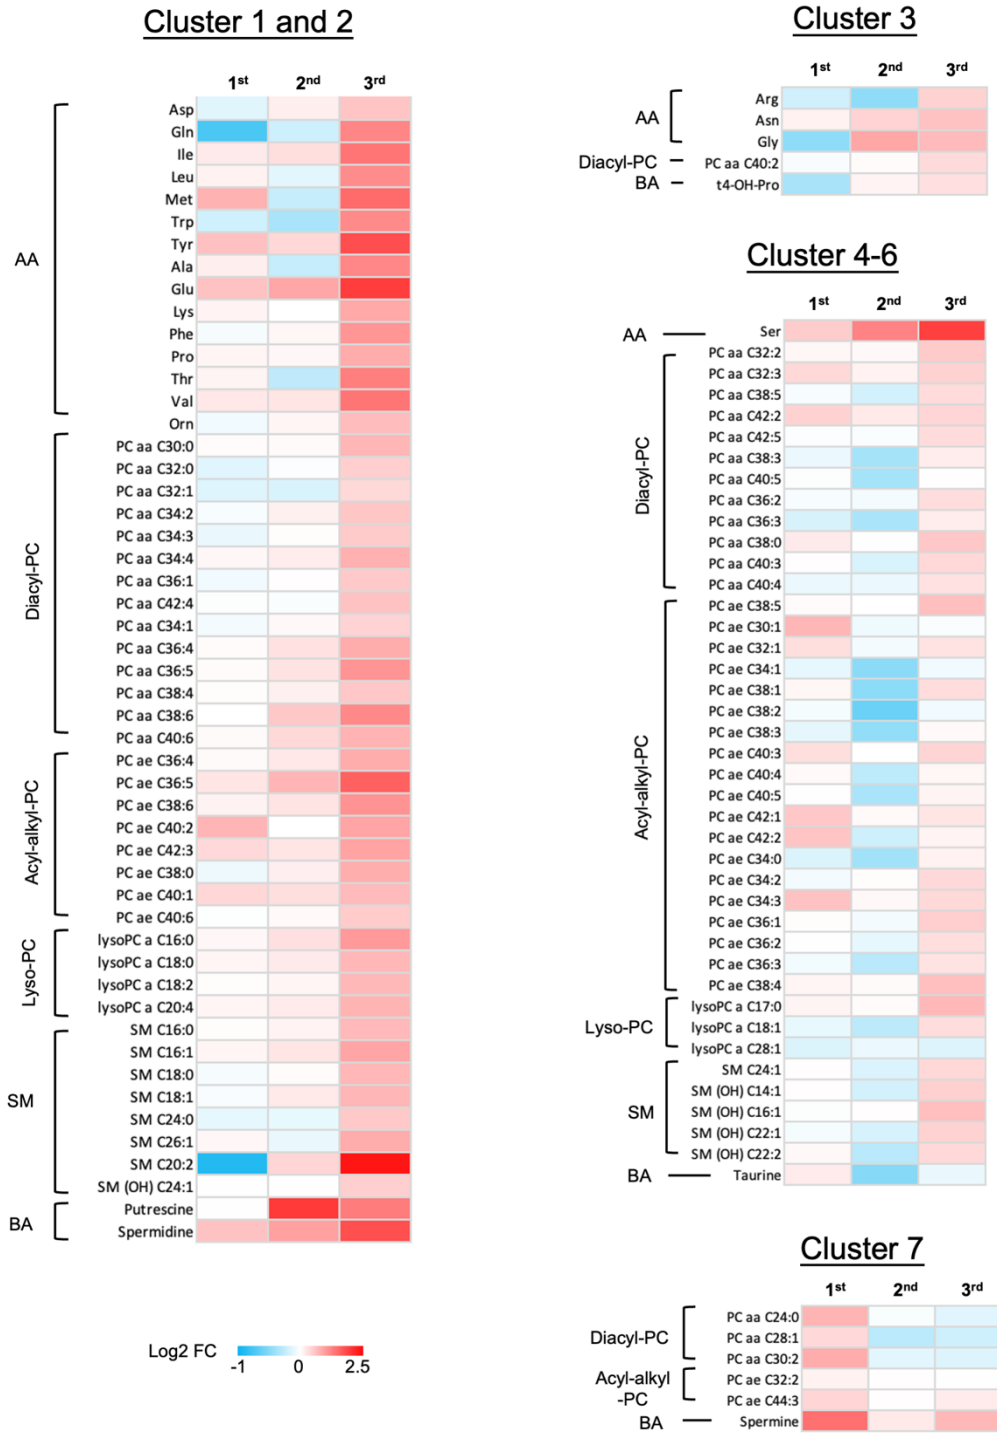

**Supplementary Figure 4. Dynamic changes of metabolic profiles in isolated islets during the three trimesters of pregnancy.** Fold changes are log transformed and indicated by color scale in the matrix. Metabolites within each cluster were indicated. Red color indicates up-regulated in pregnant mice, whereas blue represents down-regulated in pregnant mice, compared to age-matched, non-pregnant female mice.

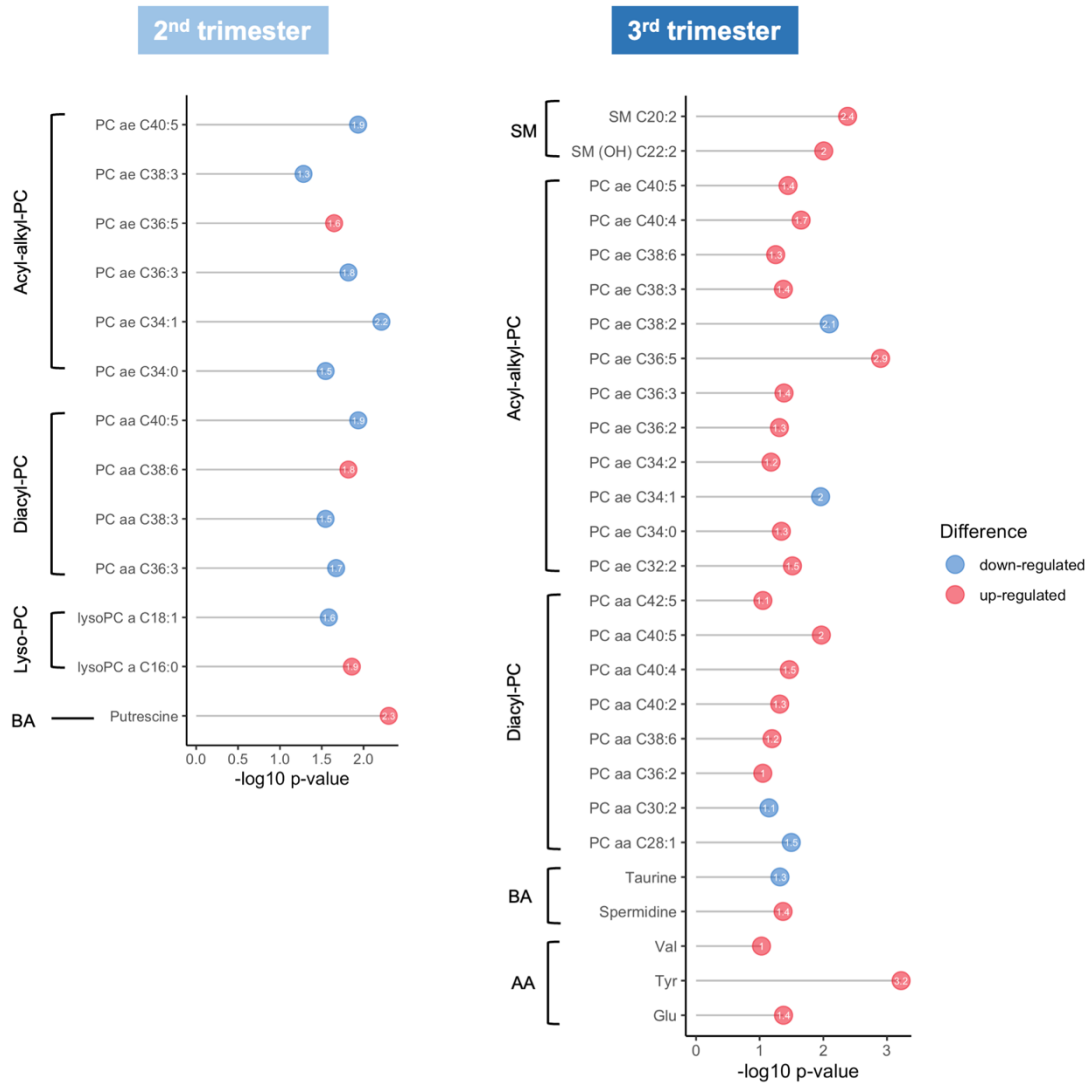

**Supplementary Figure 5. Differentially expressed metabolites in isolated islets during the three trimesters of pregnancy.** Bubble plots showing the differentially expressed metabolites (FDR<0.3) with the  $-\log_{10}$  p-values. Red indicates up-regulated in pregnant mice, blue indicates down-regulated in pregnant mice, compared to age-matched, non-pregnant female mice.
